# Supplementary material for: Modulation of the electronic states and magnetic properties of nickel catecholdithiolene complex by oxidation-coupled deprotonation
Source: Royal Society of Chemistry journal article supplement (doi:10.1039/d1tc01111a), 2021-01-01
Supplement: d1tc01111a1.pdf [file d1tc01111a1.pdf]

## Electronic Supplementary Information (ESI)

### **Modulation of the electronic states and magnetic properties of nickel catecholdithiolene complex by oxidation-coupled deprotonation**

So Yokomori,<sup>a</sup> Shun Dekura,<sup>\*a</sup> Akira Ueda,<sup>b</sup> Reiji Kumai,<sup>c</sup> Youichi Murakami,<sup>c</sup> and Hatsumi Mori<sup>\*a</sup>

<sup>a.</sup> *The Institute for Solid State Physics, The University of Tokyo, Kashiwa, Chiba 2778581, Japan. E-mail: s.dekura@issp.u-tokyo.ac.jp, hmori@issp.u-tokyo.ac.jp; Fax: +81 4 7136 3410; Tel: +81 4 7136 3201*

<sup>b.</sup> *Department of Chemistry, Faculty of Advanced Science and Technology, Kumamoto University, 2-39-1 Kurokami, Chuo-ku, Kumamoto 860-8555, Japan*

<sup>c.</sup> *Condensed Matter Research Center (CMRC) and Photon Factory, Institute of Materials Structure Science, High Energy Accelerator Research Organization (KEK), Tsukuba, Ibaraki 3050801, Japan*

### **Table of Contents**

|                                                                                                                                                                 |         |
|-----------------------------------------------------------------------------------------------------------------------------------------------------------------|---------|
| Preparation and crystal structures of <b>3-Ni-4H·DMSO</b> , <b>3-Ni-3H·0.5H<sub>2</sub>O</b> , <b>3-Ni-3H·0.5THF</b> , and <b>3-Ni-2H·2H<sub>2</sub>O</b> ..... | S2–S10  |
| Magnetic properties of <b>3-Ni-4H·DMSO</b> .....                                                                                                                | S11–S12 |
| Differential Fourier map and calculation model for <b>3-Ni-3H·0.5THF</b> .....                                                                                  | S13     |
| Compositions and structures of crystals with neutral nickel complex .....                                                                                       | S14–S18 |
| <sup>1</sup> H NMR spectrum of the green powder obtained from <b>2-Ni</b> .....                                                                                 | S19     |
| References .....                                                                                                                                                | S20     |

## Preparation and crystal structures of 3-Ni-4H·DMSO, 3-Ni-3H·0.5H<sub>2</sub>O, 3-Ni-3H·0.5THF, and 3-Ni-2H·2H<sub>2</sub>O

Simplified synthetic scheme and crystallographic parameters for the obtained crystals were described in the following Figure S1 and Table S1, respectively.

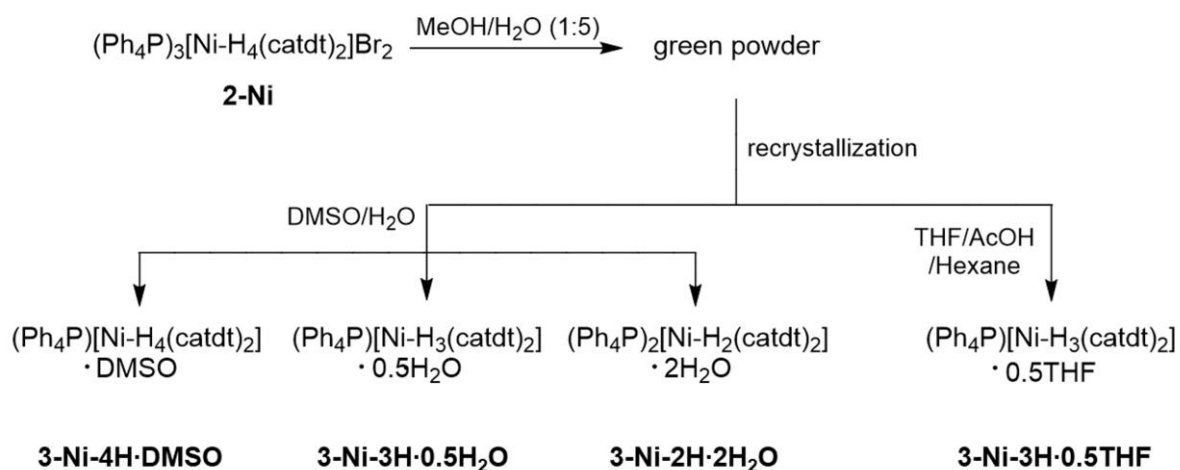

**Fig. S1** Synthetic scheme of  $(\text{Ph}_4\text{P})[\text{Ni-H}_4(\text{catdt})_2] \cdot \text{DMSO}$ , **3-Ni-4H·DMSO**;  $(\text{Ph}_4\text{P})[\text{Ni-H}_3(\text{catdt})_2] \cdot 0.5\text{H}_2\text{O}$ , **3-Ni-3H·0.5H<sub>2</sub>O**;  $(\text{Ph}_4\text{P})_2[\text{Ni-H}_2(\text{catdt})_2] \cdot 2\text{H}_2\text{O}$ , **3-Ni-2H·2H<sub>2</sub>O**; and  $(\text{Ph}_4\text{P})[\text{Ni-H}_3(\text{catdt})_2] \cdot 0.5\text{THF}$ , **3-Ni-3H·0.5THF** using previously reported  $(\text{Ph}_4\text{P})_3[\text{Ni-H}_4(\text{catdt})_2]\text{Br}_2$ .<sup>1</sup>

**Table S1.** Crystallographic parameters for the crystals **3-Ni-4H-DMSO**, **3-Ni-3H·0.5H<sub>2</sub>O**, **3-Ni-3H·0.5THF**, and **3-Ni-2H·2H<sub>2</sub>O**.

|                                                       | <b>3-Ni-4H-DMSO</b>                                              | <b>3-Ni-3H·0.5H<sub>2</sub>O</b>                                 | <b>3-Ni-3H·0.5THF</b>                                              | <b>3-Ni-2H·2H<sub>2</sub>O</b>                                                 |
|-------------------------------------------------------|------------------------------------------------------------------|------------------------------------------------------------------|--------------------------------------------------------------------|--------------------------------------------------------------------------------|
| formula                                               | C <sub>38</sub> H <sub>34</sub> NiO <sub>5</sub> PS <sub>5</sub> | C <sub>36</sub> H <sub>29</sub> NiO <sub>5</sub> PS <sub>4</sub> | C <sub>38</sub> H <sub>31</sub> NiO <sub>4.5</sub> PS <sub>4</sub> | C <sub>60</sub> H <sub>46</sub> NiO <sub>6</sub> P <sub>2</sub> S <sub>4</sub> |
| formula weight                                        | 820.66                                                           | 759.51                                                           | 777.55                                                             | 1111.86                                                                        |
| crystal system                                        | triclinic                                                        | monoclinic                                                       | triclinic                                                          | triclinic                                                                      |
| space group                                           | $P\bar{1}$                                                       | $P2_1/c$                                                         | $P\bar{1}$                                                         | $P\bar{1}$                                                                     |
| <i>a</i> (Å)                                          | 10.188(2)                                                        | 7.1612(5)                                                        | 11.3377(2)                                                         | 13.9446(3)                                                                     |
| <i>b</i> (Å)                                          | 13.333(3)                                                        | 16.3222(8)                                                       | 12.8849(2)                                                         | 12.5782(3)                                                                     |
| <i>c</i> (Å)                                          | 13.778(3)                                                        | 28.1125(15)                                                      | 13.4427(7)                                                         | 17.5902(7)                                                                     |
| $\alpha$ (deg.)                                       | 92.947(3)                                                        | 90                                                               | 80.666(1)                                                          | 70.3620(10)                                                                    |
| $\beta$ (deg.)                                        | 99.616(4)                                                        | 90.563(5)                                                        | 69.189(1)                                                          | 76.0230(10)                                                                    |
| $\gamma$ (deg.)                                       | 94.177(4)                                                        | 90                                                               | 69.799(1)                                                          | 104.3310(10)                                                                   |
| <i>V</i> (Å <sup>3</sup> )                            | 1836.5(8)                                                        | 3285.8(3)                                                        | 1720.99(10)                                                        | 2631.12(14)                                                                    |
| <i>Z</i>                                              | 2                                                                | 4                                                                | 2                                                                  | 2                                                                              |
| <i>T</i> (K)                                          | 293                                                              | 293                                                              | 293                                                                | 293                                                                            |
| <i>D</i> <sub>calc</sub> (g·cm <sup>-3</sup> )        | 1.484                                                            | 1.535                                                            | 1.502                                                              | 1.403                                                                          |
| $\lambda$ (Å)                                         | 0.71073                                                          | 0.71073                                                          | 0.71073                                                            | 0.99968                                                                        |
| <i>R</i> <sub>int</sub>                               | 0.0218                                                           | 0.0878                                                           | 0.0163                                                             | 0.0307                                                                         |
| <i>R</i> <sub>1</sub> ( <i>I</i> > 2.00σ( <i>I</i> )) | 0.0478                                                           | 0.0890                                                           | 0.0368                                                             | 0.0386                                                                         |
| <i>wR</i> <sub>2</sub>                                | 0.1361                                                           | 0.1475                                                           | 0.0981                                                             | 0.1074                                                                         |
| (All reflections)                                     |                                                                  |                                                                  |                                                                    |                                                                                |
| GOF                                                   | 1.065                                                            | 1.108                                                            | 1.032                                                              | 0.740                                                                          |
| CCDC                                                  | 2065214                                                          | 2065215                                                          | 2065216                                                            | 2065217                                                                        |

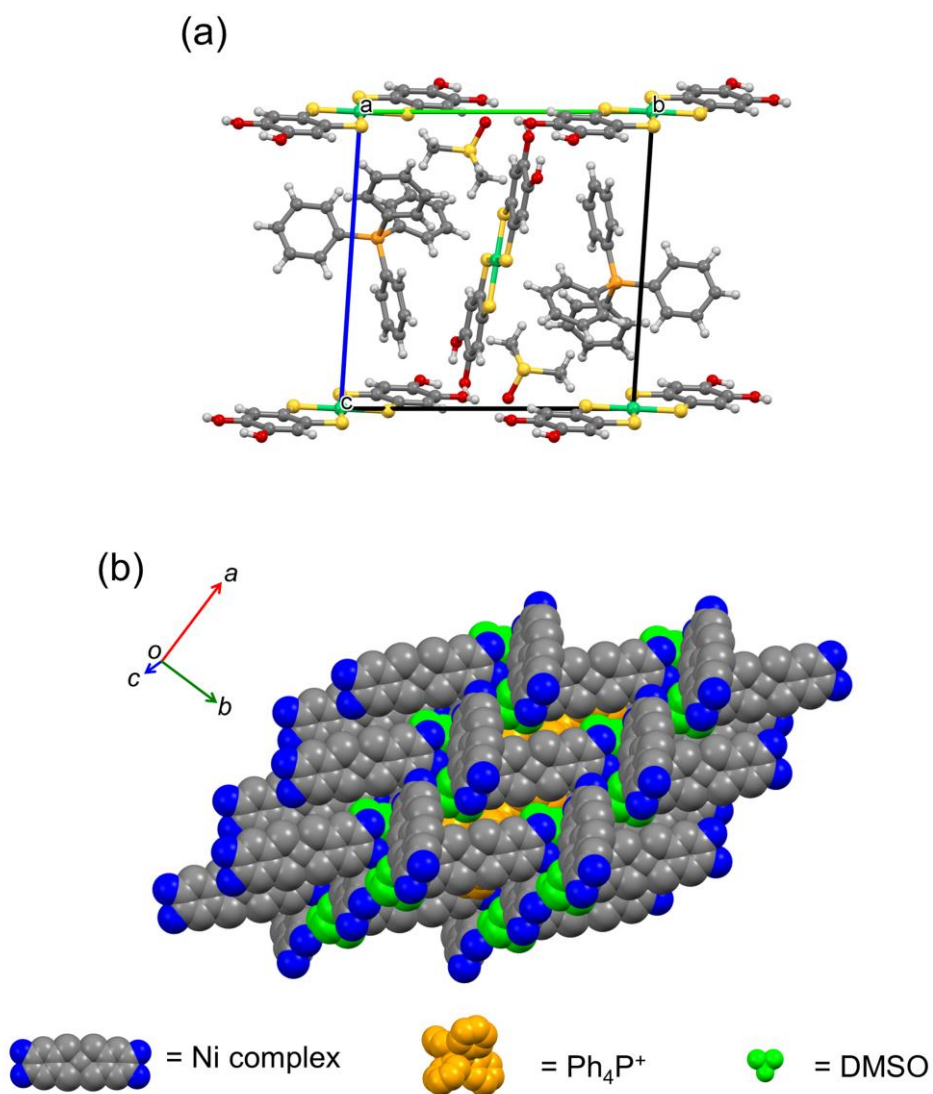

**Fig. S2** Structure of the DMSO-containing crystal **3-Ni-4H·DMSO**. (a) Unit cell and (b) overview of the 3D framework structure (left), and the top view of the framework (right). Light green = Ni, yellow = S, orange = P, gray = C, red = O, and white = H.

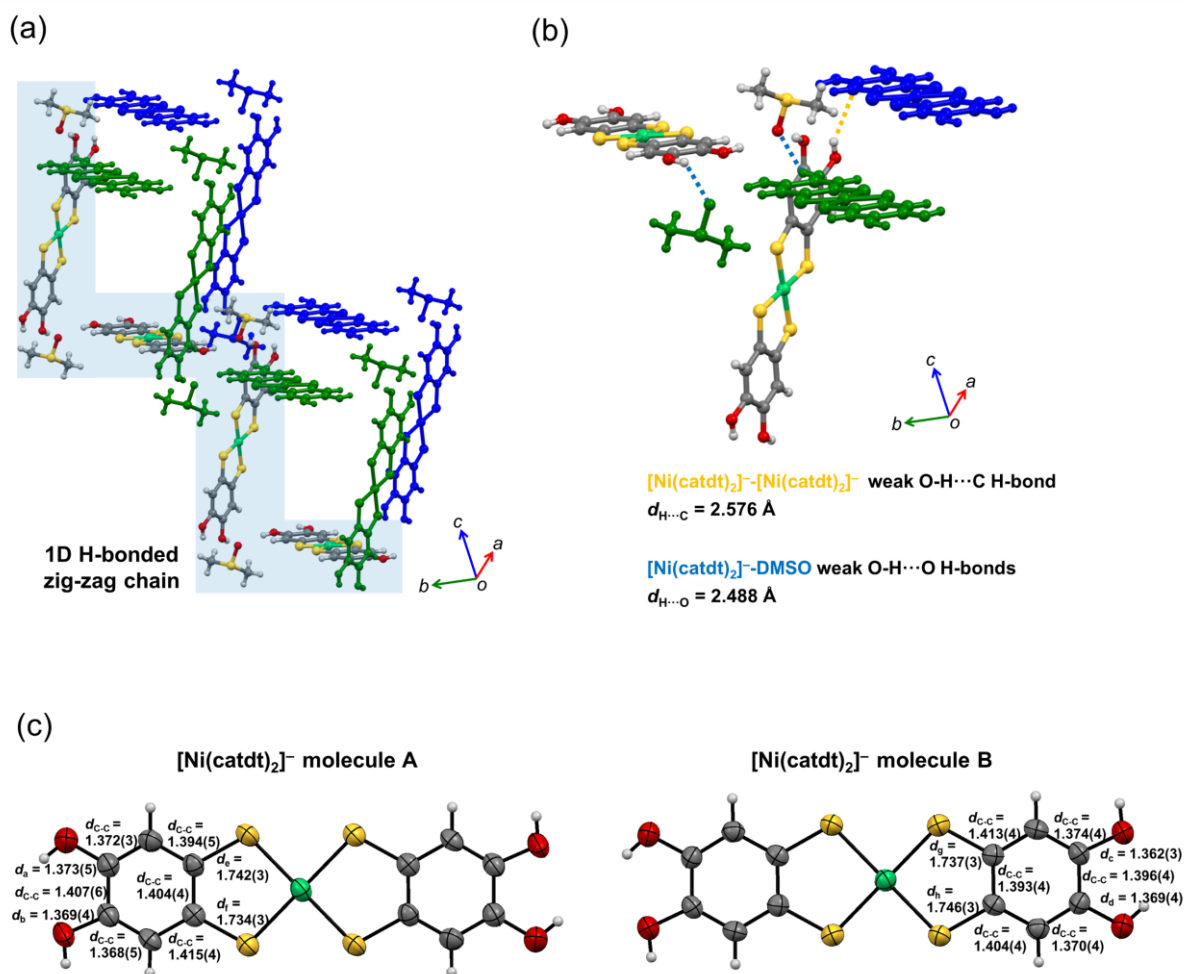

**Fig. S3** Details of the H-bonded structure and molecular structure in **3-Ni-4H·DMSO**. (a) The 1D H-bonded zig-zag chains in the 3D framework structure. Blue and green molecules belong to different 1D chains, respectively. (b) Weak intermolecular H-bonds on a node of the framework structure. (c) The molecular structures and bond lengths of crystallographically half-independent nickel complexes. Here,  $d_{\text{C-C}}$  indicates the C–C bond lengths, and  $d_{\text{a}} \sim d_{\text{h}}$  correspond to the C–O or C–S bond described in Table 1 in the main text.

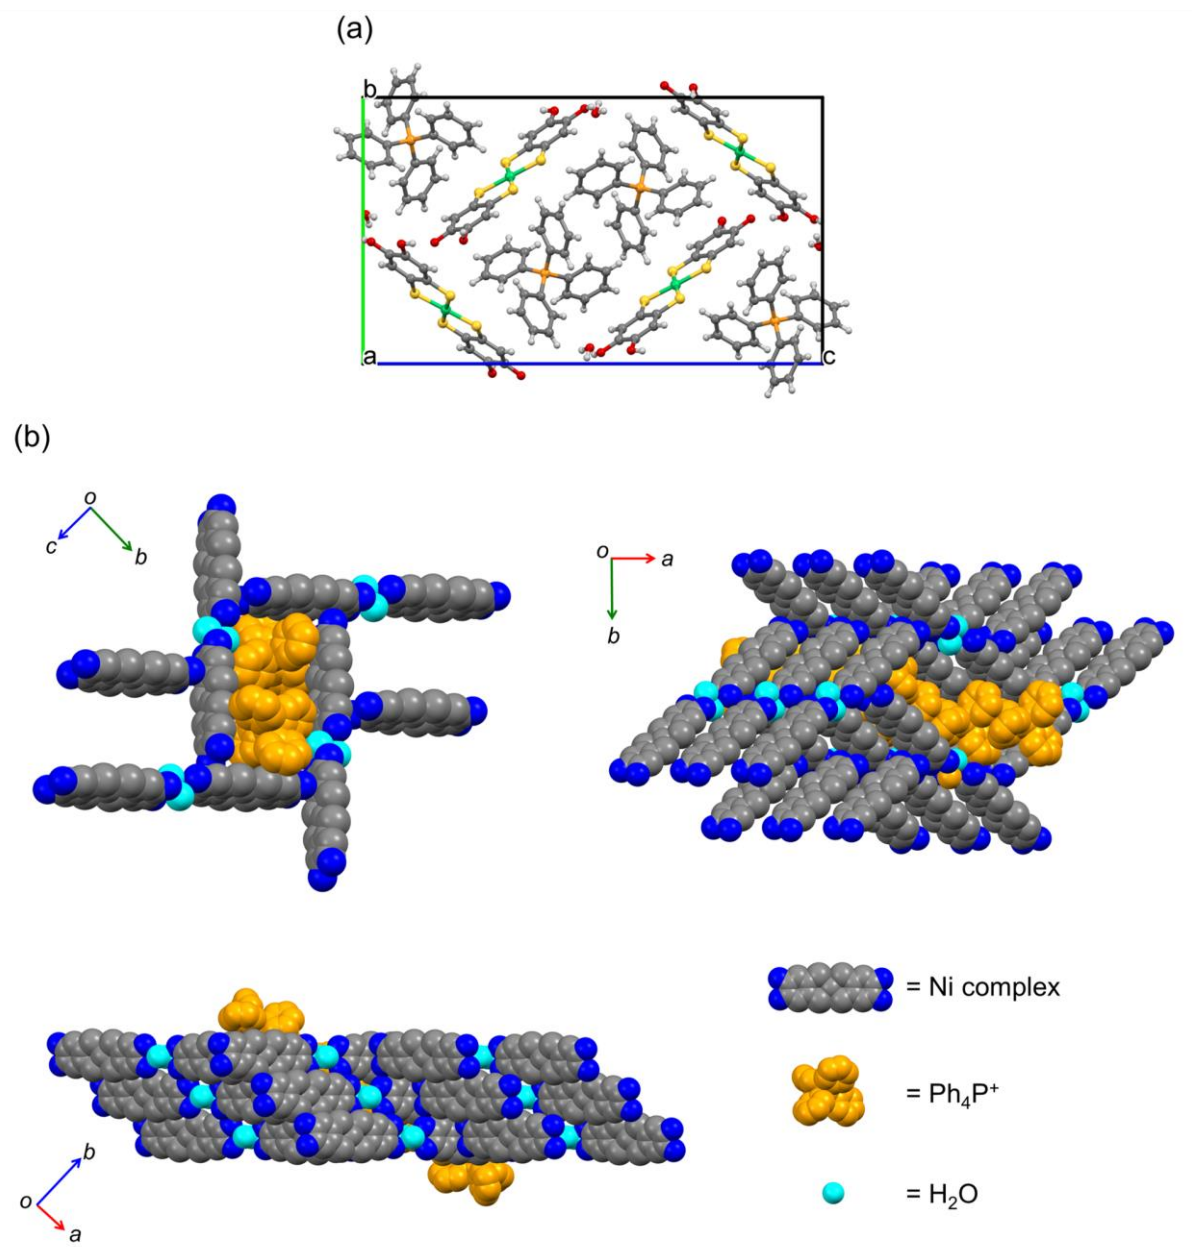

**Fig. S4** Structure of the  $\text{H}_2\text{O}$ -containing crystal  $3\text{-Ni-3H}\cdot 0.5\text{H}_2\text{O}$ . (a) Unit cell and (b) overview of the 3D framework structure viewed along each axis. In (a), light green = Ni, yellow = S, orange = P, gray = C, red = O, and white = H.

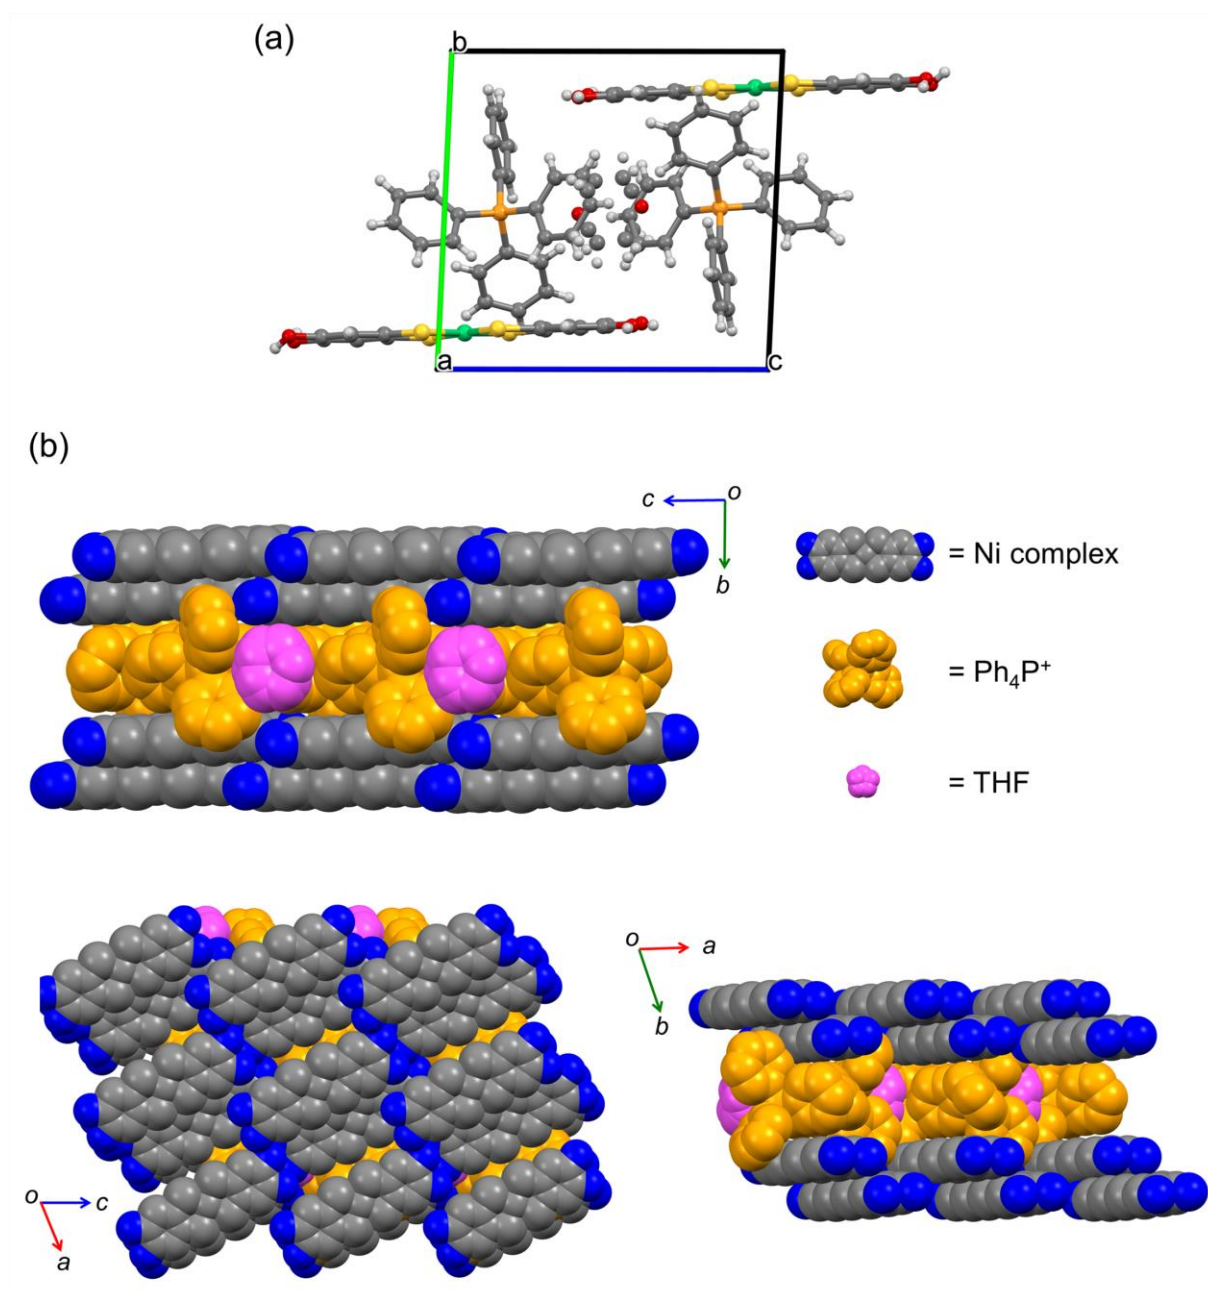

**Fig. S5** Structure of the THF-containing crystal, **3-Ni-3H·0.5THF**. (a) Unit cell and (b) overview of the 2D sheet structure viewed along each axis. In (a), light green = Ni, yellow = S, orange = P, gray = C, red = O, and white = H.



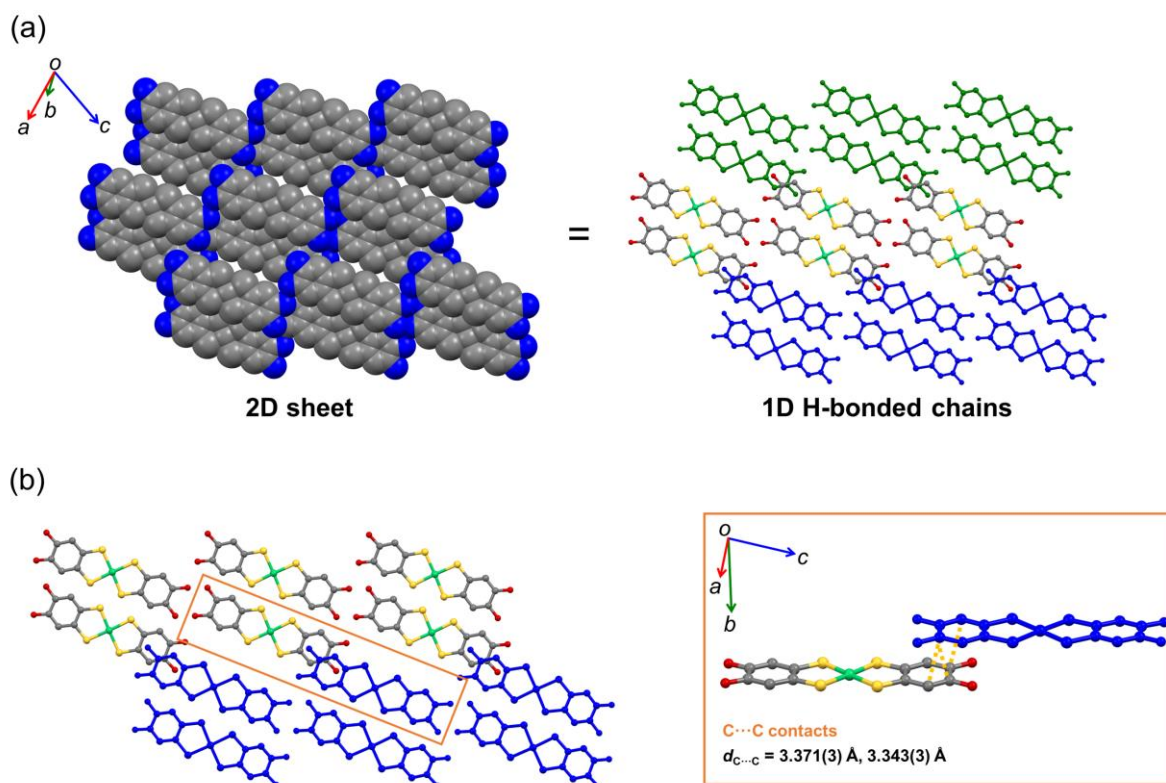

**Fig. S6** (a) Correspondence between the 2D sheet structure and 1D H-bonded chains of **3-Ni-3H·0.5THF**. (b) Neighboring 1D H-bonded chains. Colored nickel complexes belong to the same 1D H-bonded chain (left) and  $\pi$ - $\pi$  interactions (C···C contacts) between nickel complexes belonging to each chain (right). The orange box focuses on the two nickel complexes belonging to different 1D H-bonded chains.

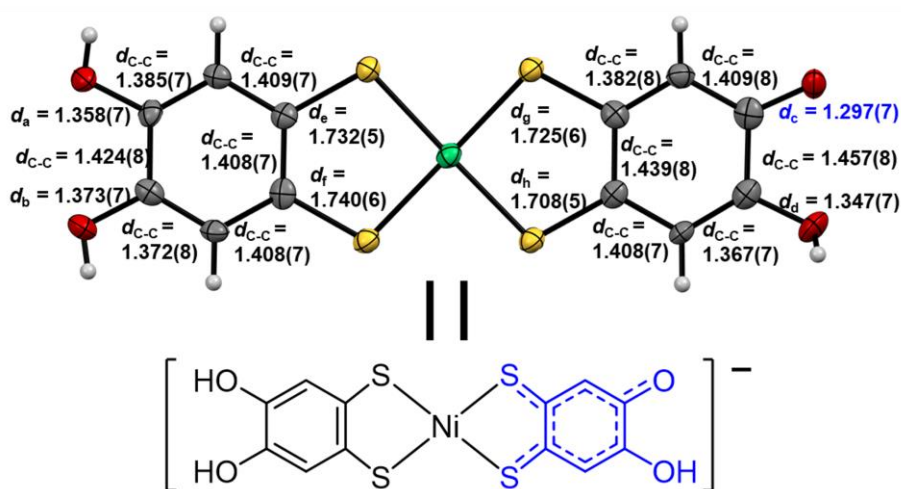

**Fig. S7** The molecular structures and bond lengths of crystallographically independent nickel complex in **3-Ni-3H·0.5H<sub>2</sub>O**.



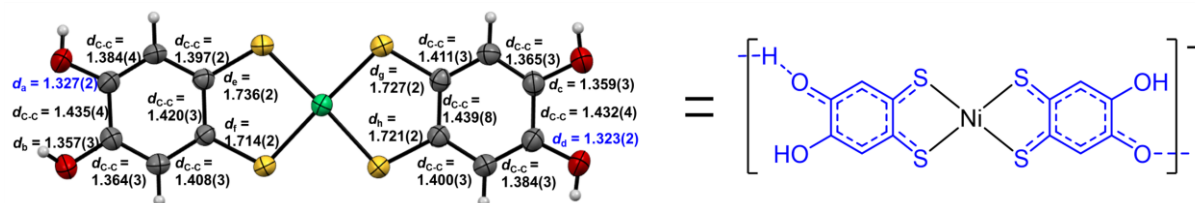

**Fig. S8** The molecular structures and bond lengths of crystallographically independent nickel complex in **3-Ni-3H·0.5THF**.

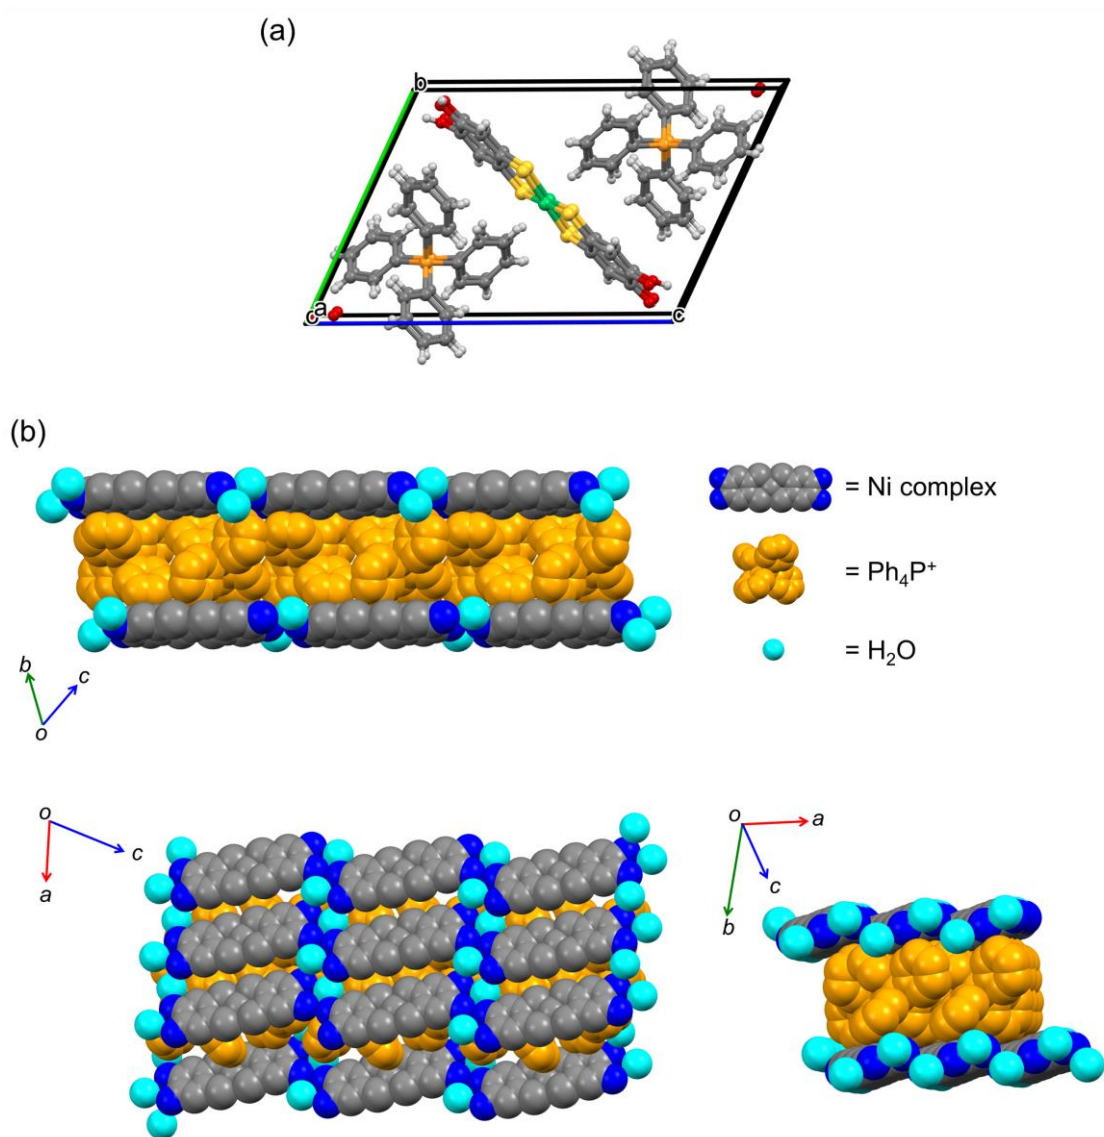

**Fig. S9** Structure of the water-containing crystal, **3-Ni-2H·2H<sub>2</sub>O**. (a) Unit cell and (b) the 2D H-bonded sheet structure viewed along each axis.

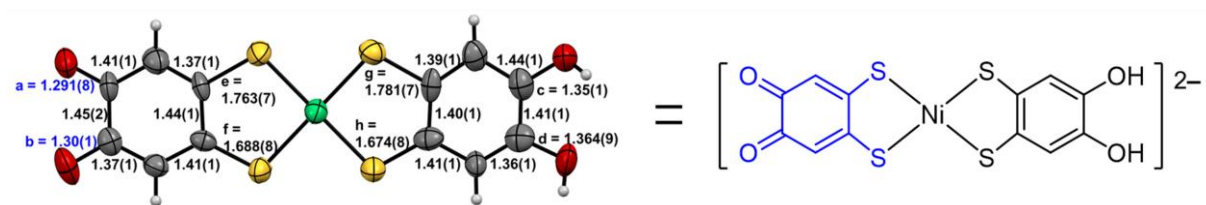

**Fig. S10** Molecular structure, bond lengths (Å) and the possible chemical structure of the nickel complex in **3-Ni-2H<sub>2</sub>O**.

## Magnetic properties of 3-Ni-4H·DMSO

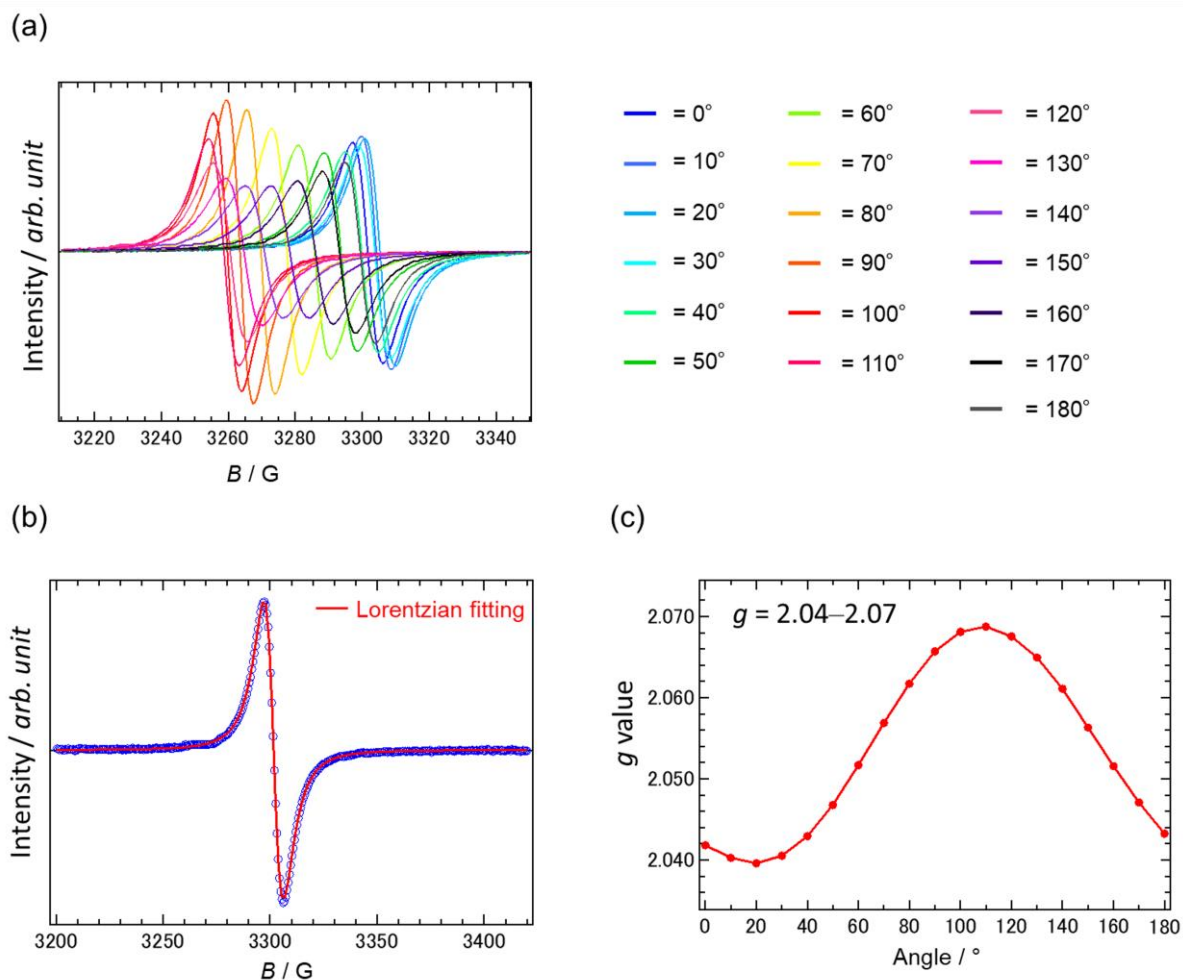

**Fig. S11** (a) ESR signals measured under the magnetic field rotated around the  $a$  axis of **3-Ni-4H·DMSO** single crystal. (b) Lorentzian fitting of the ESR signal at 0 degrees in (a). (c) Angle dependence of the  $g$  value estimated from the Lorentzian fitting for the measurements.

The temperature dependence of the magnetic susceptibility of **3-Ni-4H·DMSO** was shown in Fig. S12. The Curie constant obtained by the fitting ( $0.382 \text{ emu K mol}^{-1}$ ) gives the  $g$  value to be 2.016 in the case of  $S = 1/2$ . This value is similar to that obtained from ESR measurement, rather than that of organic radicals (2.003).

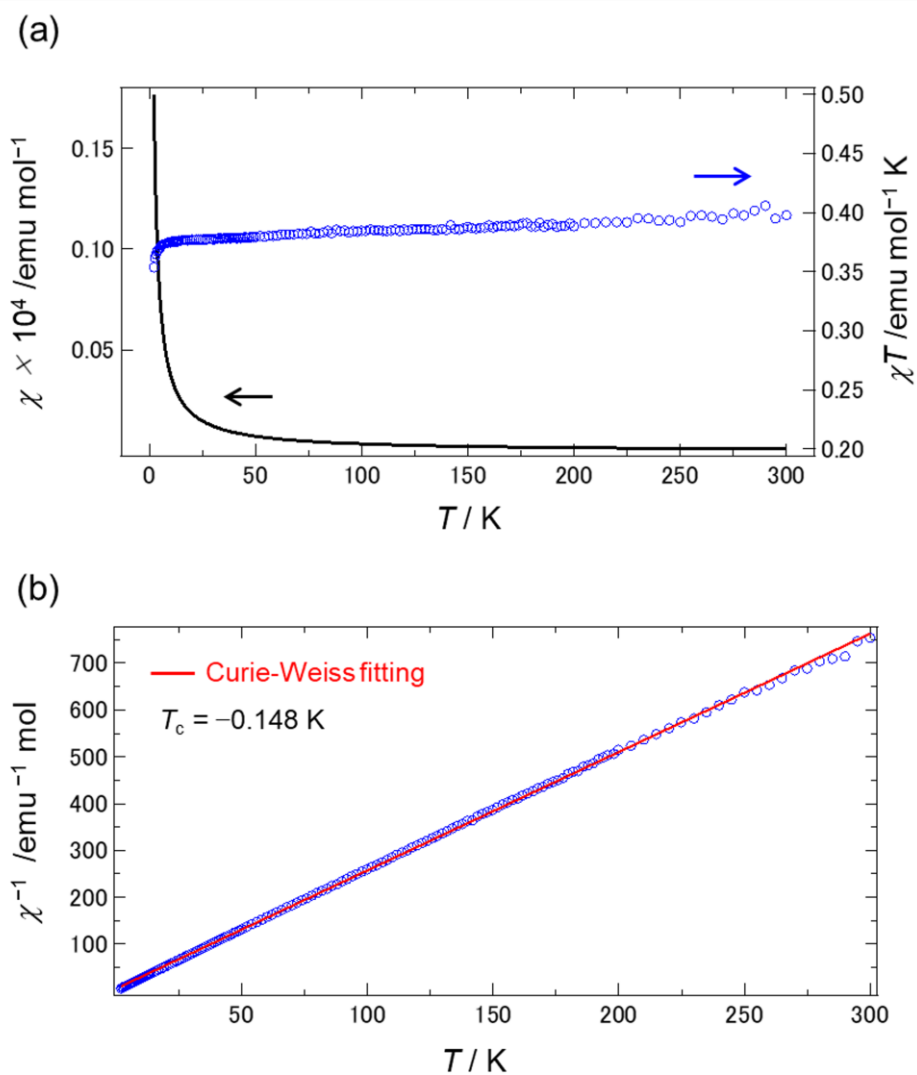

**Fig. S12.** Temperature dependences on the magnetic susceptibility of **3-Ni-4H-DMSO** polycrystals. (a)  $\chi$ - $T$  plot (black solid line) together with  $\chi T$ - $T$  plot (blue circles). (b)  $\chi^{-1}$ - $T$  plot (blue circles) and Curie-Weiss fitting (red solid line).

# Differential Fourier map and calculation model for 3-Ni-3H·0.5THF

(a)

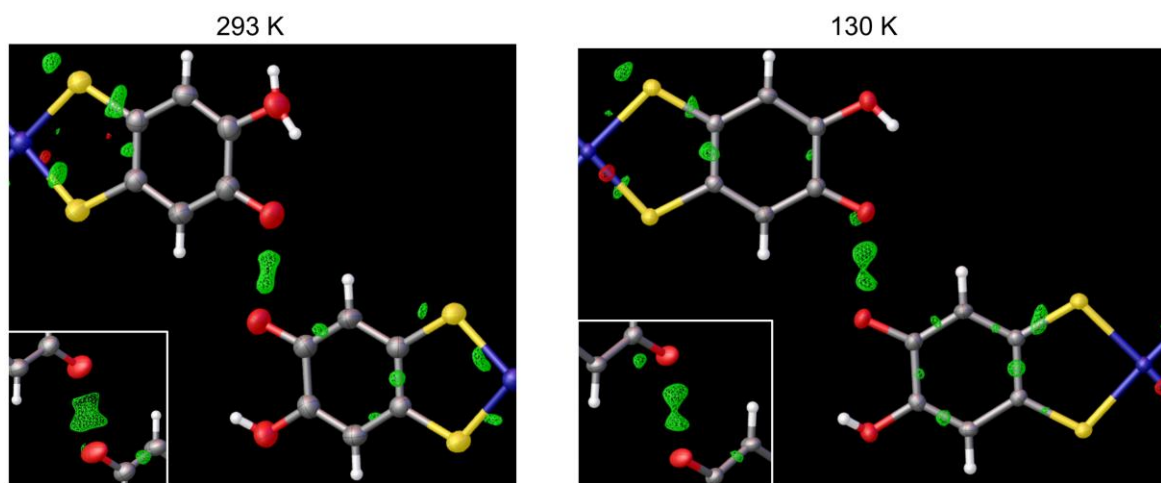

(b)

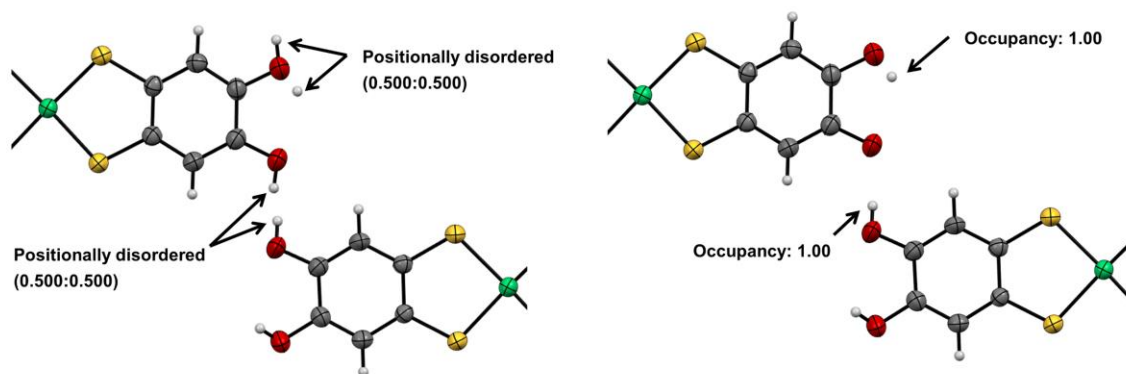

**Fig. S13** (a) Differential Fourier maps around the short H-bond between hydroxy groups of nickel complex calculated from single-crystal XRD data. The threshold value of the differential Fourier surface is 0.300 electrons/Å<sup>3</sup> at 293 K and 0.400 electron/Å<sup>3</sup> at 130 K, respectively. The inset figures show enlarged views of the short [O-H...O] H-bonding part. These figures were visualized by the Olex2 software. (b) Positional disorder of the protons in the short H-bond part considered in the structural analysis (left) and structural model used on the DFT calculation of 3-Ni-3H·0.5THF (right).

### Compositions and structures of crystals with neutral nickel complex

The chemical formulas of two crystals having neutral nickel complex are  $(\text{Ph}_4\text{P})_2[\text{Ni}-\text{H}_4(\text{catdt})_2]\text{Br}_2 \cdot \text{DMF}$  (DMF: *N,N*-dimethylformamide); **3-Ni-4H·DMF**, and  $(\text{Ph}_4\text{P})_2[\text{Ni}-\text{H}_3(\text{catdt})_2]_2[\text{Ni}-\text{H}_4(\text{catdt})_2] \cdot \text{solv.}$ ; **3-Ni-3,4H·solv**, respectively. The SQUEEZE equipped in the PLATON program<sup>2-4</sup> was used to remove disordered crystal solvent molecules in the latter crystal. The recrystallizations were performed by liquid-liquid diffusion method of DMF and  $\text{Et}_2\text{O}$  (~1:3) using **2-Ni** for **3-Ni-4H·DMF** (under atmosphere) and of Acetone/Acetic acid/Hexane (~10:1:30) solution for using the resulting green powder prepared from **2-Ni** for **3-Ni-3,4H·solv** (under argon).

**Table S2.** The crystallographic data for the crystals consisting of neutral non-deprotonated nickel complex, [Ni-H<sub>4</sub>(catdt)<sub>2</sub>].

| crystals                                              | <b>3-Ni-4H·DMF</b>                                                                                              | <b>3-Ni-3,4H·solv</b>                                                            |
|-------------------------------------------------------|-----------------------------------------------------------------------------------------------------------------|----------------------------------------------------------------------------------|
| formula                                               | C <sub>114</sub> H <sub>102</sub> Br <sub>4</sub> N <sub>2</sub> NiO <sub>8</sub> P <sub>4</sub> S <sub>4</sub> | C <sub>42</sub> H <sub>31</sub> Ni <sub>1.5</sub> O <sub>6</sub> PS <sub>6</sub> |
| formula weight                                        | 2258.44                                                                                                         | 952.13                                                                           |
| crystal system                                        | triclinic                                                                                                       | triclinic                                                                        |
| space group                                           | <i>P</i> $\bar{1}$                                                                                              | <i>P</i> $\bar{1}$                                                               |
| <i>a</i> (Å)                                          | 9.4401(18)                                                                                                      | 10.770(5)                                                                        |
| <i>b</i> (Å)                                          | 14.660(3)                                                                                                       | 13.090(6)                                                                        |
| <i>c</i> (Å)                                          | 21.242(4)                                                                                                       | 15.722(7)                                                                        |
| $\alpha$ (deg)                                        | 92.947(3)                                                                                                       | 71.015(14)                                                                       |
| $\beta$ (deg)                                         | 83.678(7)                                                                                                       | 84.98(2)                                                                         |
| $\gamma$ (deg)                                        | 77.178(6)                                                                                                       | 87.58(2)                                                                         |
| <i>V</i> (Å <sup>3</sup> )                            | 77.841(6)                                                                                                       | 2087.6(17)                                                                       |
| <i>Z</i>                                              | 1                                                                                                               | 2                                                                                |
| <i>T</i> (K)                                          | 293                                                                                                             | 293                                                                              |
| <i>D</i> <sub>calc</sub><br>(g·cm <sup>-3</sup> )     | 1.341                                                                                                           | 1.515                                                                            |
| $\lambda$ (Å)                                         | 0.71073                                                                                                         | 0.71073                                                                          |
| <i>R</i> <sub>int</sub>                               | 0.0259                                                                                                          | 0.0880                                                                           |
| <i>R</i> <sub>1</sub> ( <i>I</i> > 2.00σ( <i>I</i> )) | 0.0641                                                                                                          | 0.1176                                                                           |
| <i>wR</i> <sub>2</sub><br>(All reflections)           | 0.2082                                                                                                          | 0.3965                                                                           |
| GOF                                                   | 1.060                                                                                                           | 1.013                                                                            |
| CCDC                                                  | 2065218                                                                                                         | 2065219                                                                          |



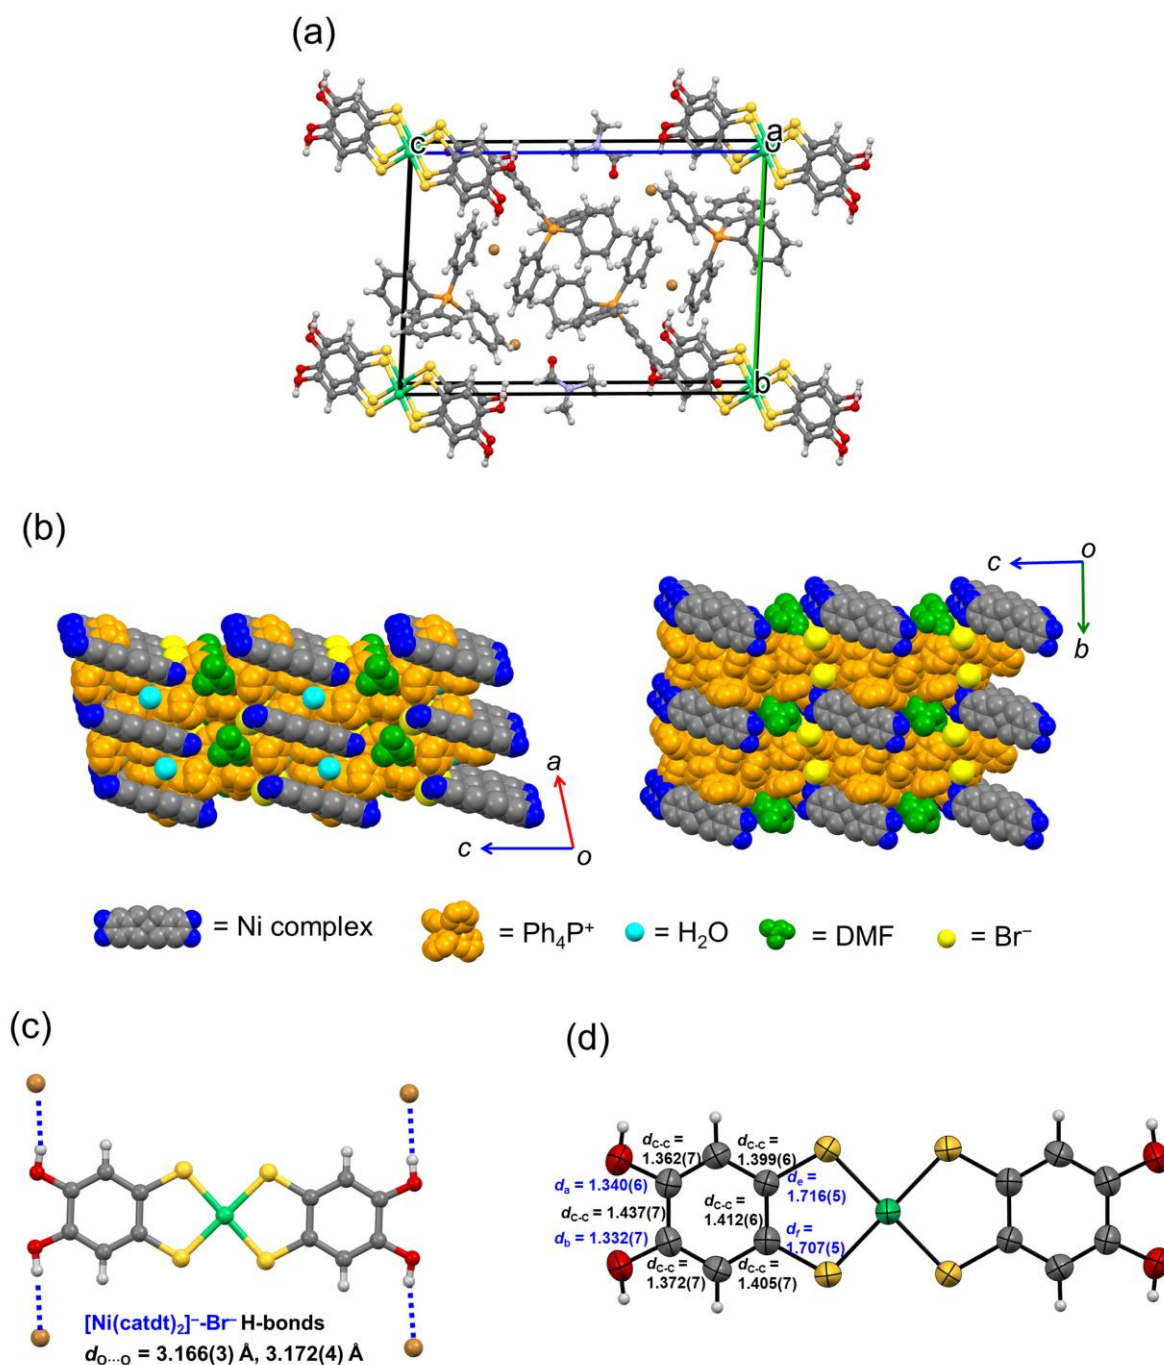

**Fig. S14** Structure of the neutral nickel complex crystal **3-Ni-4H·DMF**. (a) Unit cell and (b) overview of the assembled structure viewed along *a* and *b* axis. (c) H-bonding manner around the nickel complex. (d) Molecular structure and bond lengths of the nickel complex. In (a), (c), and (d), light green = Ni, blown = Br, yellow = S, orange = P, blue = N, gray = C, red = O, white = H.

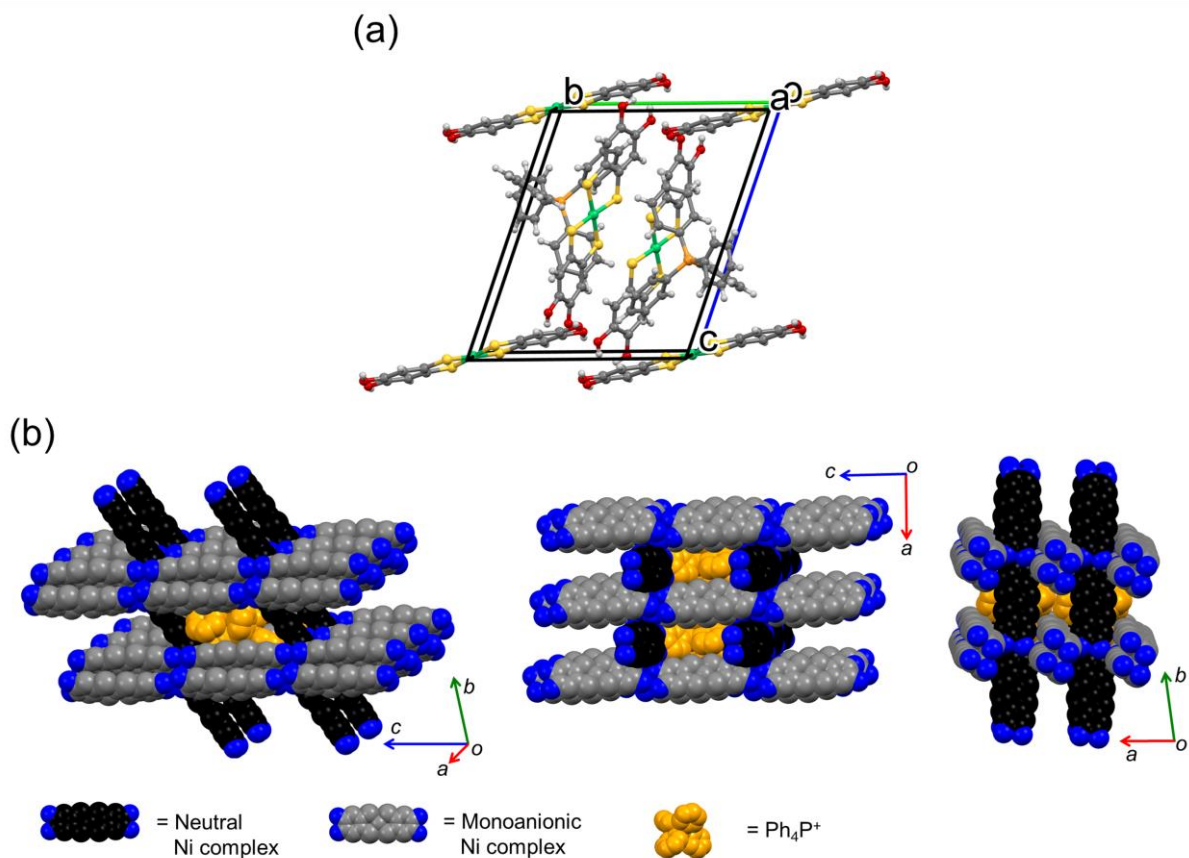

**Fig. S15** Structure of the neutral nickel complex crystal **3-Ni-3,4H·solv**. (a) Unit cell and (b) overview of the 3D framework structure viewed along  $a$  and  $b$  axis. Black molecules show neutral non-deprotonated nickel complex and gray molecules indicate monoanionic one-deprotonated nickel complex. In (a), light green = Ni, yellow = S, orange = P, gray = C, red = O, white = H.

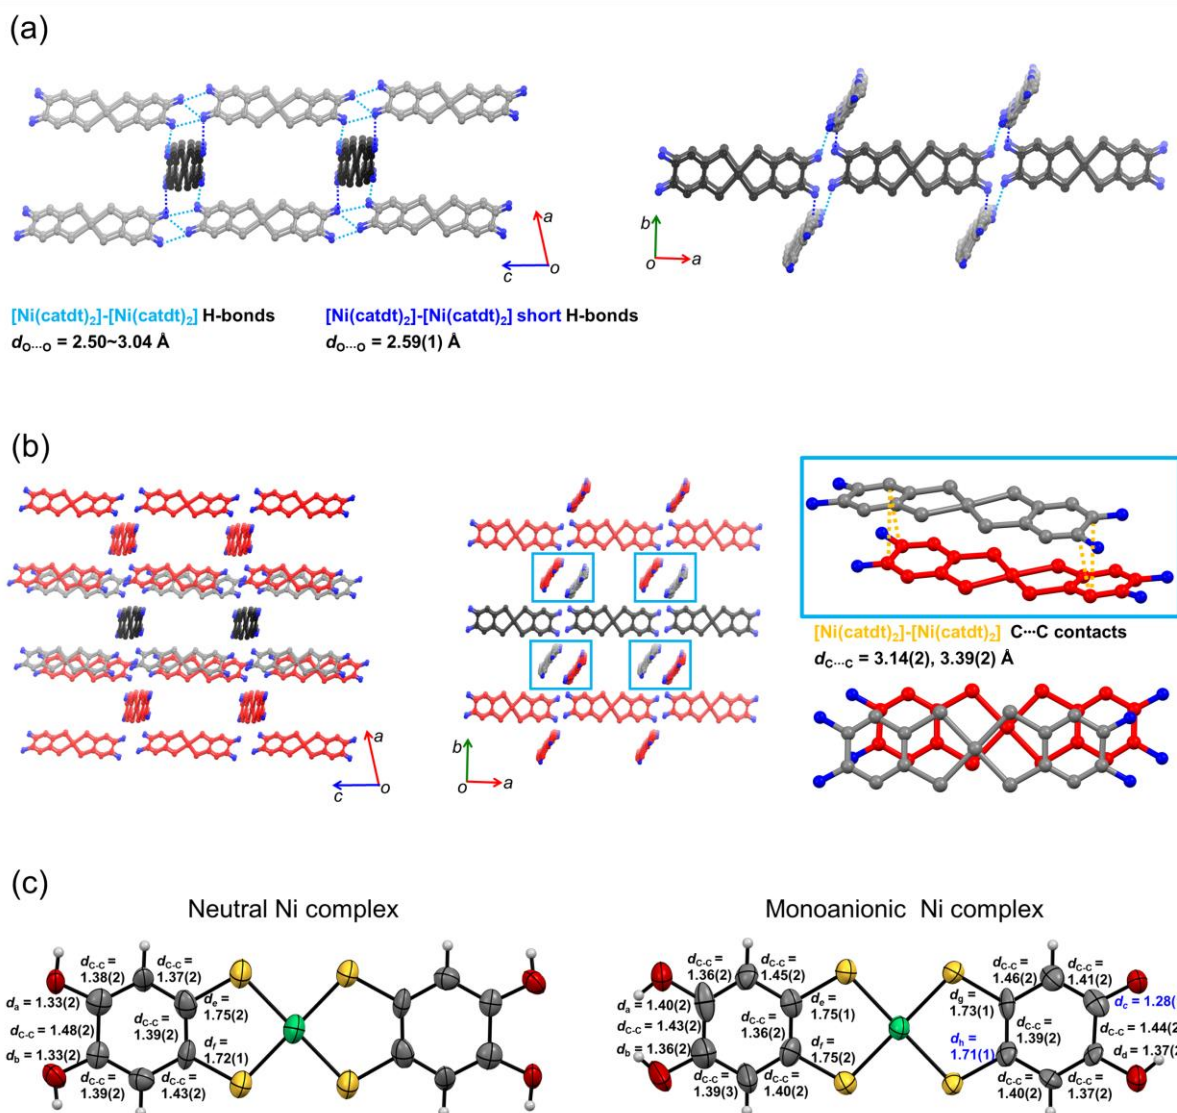

**Fig. S16** Details of the H-bonded structure and the molecular structures in **3-Ni-3,4H·solv**. (a) 2D H-bonded framework structure based on the nickel complexes. There is short [O-H...O] H-bonds between the deprotonated hydroxy group and the non-deprotonated hydroxy group of the nickel complexes. Black molecules show neutral non-deprotonated nickel complex and gray molecules indicate monoanionic one-deprotonated nickel complex. (b) Stacking manner of the 2D H-bonded frameworks and C...C contacts ( $\pi$ - $\pi$  interactions) between the nickel complexes belonging to different 2D H-bonded framework. The grey/black and red molecules show the nickel complexes belonging to individual neighboring 2D H-bonded frameworks. (c) Molecular structures and bond lengths of the nickel complexes. Neutral nickel complex is crystallographically half-molecules independent whereas monoanionic nickel complex is crystallographically one-molecule independent.

**$^1\text{H}$ -NMR spectrum of the green powder obtained from 2-Ni**

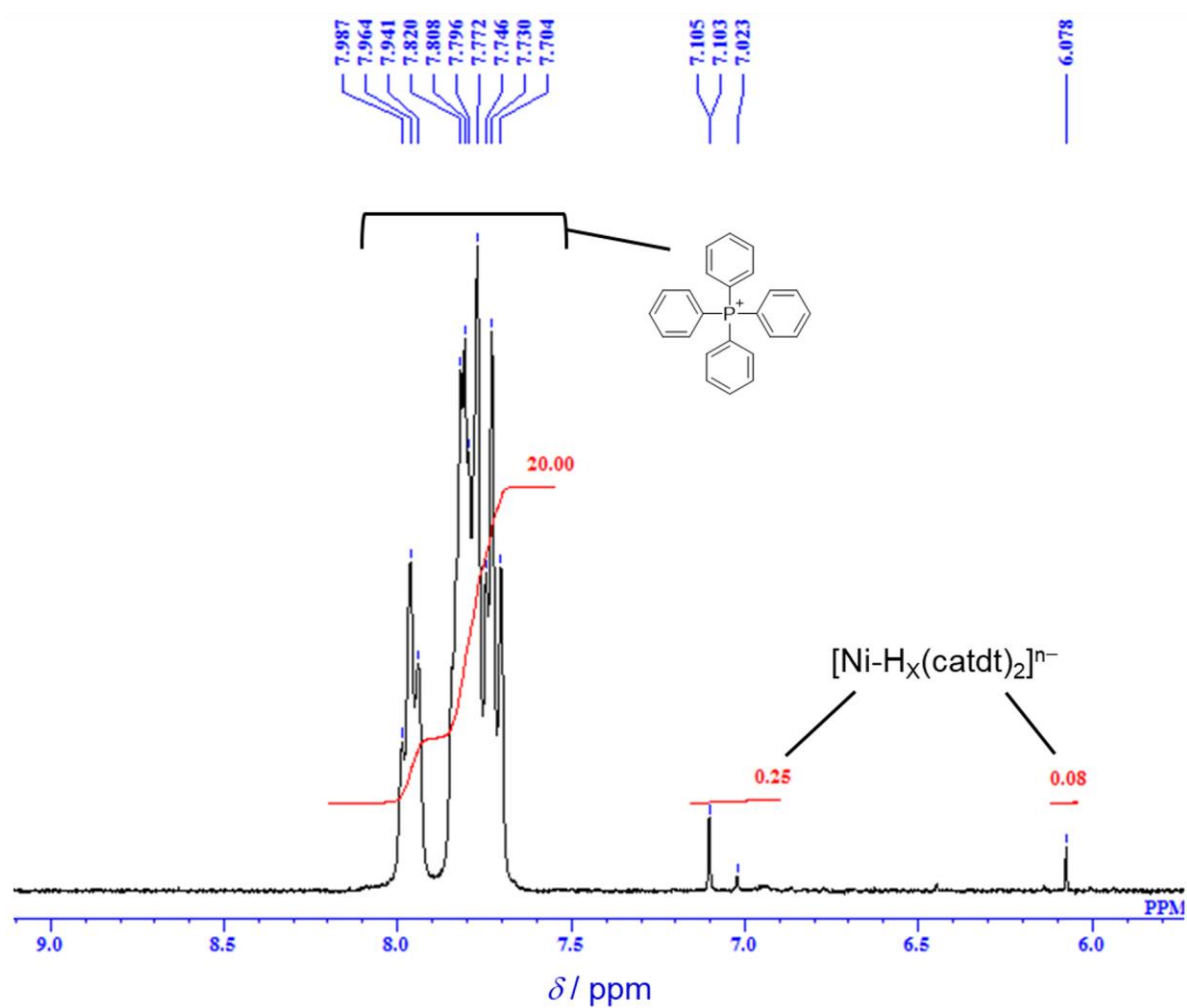

**Fig. S17**  $^1\text{H}$  NMR spectrum of the green powder prepared from **2-Ni** (300 MHz,  $\text{DMSO-}d_6$ ). Multiplets at 7.65–8.10 ppm were attributed to protons of  $\text{Ph}_4\text{P}^+$  cations. Singlets at 6.08, 7.02, and 7.10 ppm should be derived from the minor oxidized species of the nickel complex  $[\mathbf{1-}/\mathbf{4H}]$ ,  $[\mathbf{1-}/\mathbf{3H}]$ , and/or  $[\mathbf{2-}/\mathbf{2H}]$ , which are in a closed-shell state and thus NMR active.

## References

- 1 D. Coucouvanis, A. R. Paital, Q. Zhang, N. Lehnert, R. Ahlrichs, K. Fink, D. Fenske, A. K. Powell and Y. Lan, *Inorg. Chem.*, 2009, **48**, 8830.
- 2 P. v. d. Sluis and A. L. Spek, *Acta Crystallogr., Sect. A: Found. Crystallogr.*, 1990, **46**, 194.
- 3 A. L. Spek, *Acta Crystallogr., Sect. D: Biol. Crystallogr.*, 2009, **65**, 148
- 4 A. L. Spek, *Acta Crystallogr. Sect. C*, 2015, **71**, 9.
